# Supplementary material
Source: PubMed Central journal article supplement (PMC6934691)
Supplement: NIHMS1544695-supplement-13.pdf [file NIHMS1544695-supplement-13.pdf]

**Table S1 Mouse Tumor Samples - Related to Figure 6**

| Type of Sample | Protocol         | Area         | Time from EP | Cell Line Created* | ChIP-Seq | pDonor variant                                                                   |
|----------------|------------------|--------------|--------------|--------------------|----------|----------------------------------------------------------------------------------|
| <b>K27M-1</b>  | 10X 3' scRNA-seq | Disseminated | 150 days     | X                  | X        | pDonor-H3F3A-K27M-EGFP pTV1 Pdgfra D842V COTv1 Trp53-V5 WPRE                     |
| <b>K27M-2</b>  | 10X 3' scRNA-seq | Striatal     | 106 days     | X                  | X        | pDonor-smFP-mycBRIGHT- pTV1 Pdgfra D842V COTv1 Trp53 270h-P2ACO3-H3F3A K27M WPRE |
| <b>K27M-3</b>  | 10X 3' scRNA-seq | Striatal     | 149 days     | X                  | X        | pDonor-H3F3A-K27M-EGFP pTV1 Pdgfra D842V COTv1 Trp53-V5 WPRE                     |
| <b>K27M-4</b>  | 10X snATACseq    | Disseminated | 222 days†    |                    |          | pDonor-smFP-mycBRIGHT- pTV1 Pdgfra D842V COTv1 Trp53 270h-P2ACO3-H3F3A K27M WPRE |
| <b>K27M-5</b>  | 10X snATACseq    | Striatal     | 251 days†    |                    |          | pDonor-smFP-mycBRIGHT- pTV1 Pdgfra D842V COTv1 Trp53 270h-P2ACO3-H3F3A K27M WPRE |

\*-Cell lines created from parallel processing of additional GFP+ cells. All 10X scRNA- or snATAC-sequencing was done acutely from the dissociated brain tissue.

†-Initial EPed population size was decreased compared with typical results in this group leading to increased tumor formation span

**Table S3. Comparison of approaches for in vivo genetic manipulation - Related to STAR METHODS**

| Method                              | GEMM                                          | Standard EP                               | Transposition-mediated EP                  | Virus                                                | CRISPR Cas9/Cpf1                                                                     | HITI                                                                                 | SLENDR                                                                               | Base writing                                                                         | MADR                                          |
|-------------------------------------|-----------------------------------------------|-------------------------------------------|--------------------------------------------|------------------------------------------------------|--------------------------------------------------------------------------------------|--------------------------------------------------------------------------------------|--------------------------------------------------------------------------------------|--------------------------------------------------------------------------------------|-----------------------------------------------|
| Time for engineering and generation | Months                                        | ~2 weeks per plasmid                      | ~2 weeks per plasmid                       | >4-6 weeks                                           | ~2 weeks per plasmid                                                                 | ~2 weeks (plasmid); months (virus)                                                   | ~2 weeks (plasmid); months (virus)                                                   | ~2 weeks per plasmid                                                                 | ~2 weeks per plasmid                          |
| Copy number                         | 1-2 per knock-in                              | Highly Variable                           | Highly Variable (up to hundreds)           | Variable but likely less than EP                     | 1-2 but not readily controllable                                                     | 1-2 depending on zygosity of recipient        |
| Breeding                            | More complex for conditional alleles          | Not necessary                             | Not necessary                              | Only necessary for RCAS/Tva                          | Not necessary                                                                        | Not necessary                                                                        | Not necessary                                                                        | Not necessary                                                                        | 1 line per targeted stain                     |
| Stability of Expression             | Generally stable depending on locus silencing | Prone to dilution and/or silencing        | Prone to silencing and insertional effects | Prone to silencing and insertional effects           | Expression dependent on mutation site                                                | Expression dependent on insertion site or fusion partner                             | Expression dependent on insertion site or fusion partner                             | Expression dependent on mutation site                                                | Generally stable depending on locus silencing |
| Payload                             | Limited by targeting construct*               | Typically governed by plasmid limits*     | Typically governed by plasmid limits*      | Limited to viral payloads                            | Typically governed by plasmid limits but viral variant is subject to viral payloads* | Typically governed by plasmid limits but viral variant is subject to viral payloads* | Typically governed by plasmid limits but viral variant is subject to viral payloads* | Typically governed by plasmid limits but viral variant is subject to viral payloads* | Typically governed by plasmid limits*         |
| Focality                            | Depends on cis regulatory elements            | Focality depends on electrode orientation | Focality depends on electrode orientation  | Diffusion pattern unidirectional from injection site | Focality depends on electrode orientation (plasmid version) or viral spread (AAV/LV) | Focality depends on electrode orientation (plasmid version) or viral spread (AAV)    | Focality depends on electrode orientation (plasmid version) or viral spread (AAV)    | Focality depends on electrode orientation (plasmid version) or viral spread (AAV/LV) | Focality depends on electrode orientation     |
| Efficiency                          | Typically 100%                                | 100%                                      | 100%                                       | 100%                                                 | approaching 100% but off-targets and heterogeneity unclear; largely LOF              | Typically <20% but requires minicircle DNA production to reach this                  | Typically <5%                                                                        | up to 80% but off-targets and heterogeneity unclear especially when multiplexing     | Can be titered to approach 100% insertion**   |

|             |                                                 |                                                      |                                                                                                     |                                                                                                                                                                                                                                         |                                                                     |                                         |                                         |                                                                                |                                                                                                                                                                                                    |
|-------------|-------------------------------------------------|------------------------------------------------------|-----------------------------------------------------------------------------------------------------|-----------------------------------------------------------------------------------------------------------------------------------------------------------------------------------------------------------------------------------------|---------------------------------------------------------------------|-----------------------------------------|-----------------------------------------|--------------------------------------------------------------------------------|----------------------------------------------------------------------------------------------------------------------------------------------------------------------------------------------------|
| Other notes | Least amenable to mixing and matching mutations | Plasmids rarely integrate or integrate unpredictably | Random insertions, supraphysiological expression, can be silenced, in and out hopping of transgenes | Random insertions, potential supraphysiological expression, can be silenced, can incite cellular immunity, RCAS/Tva models often use injection of >50,000 avian virus producing cells--causing potential immune interactions and trauma | immunogenic, hard to definitively lineage trace, low HDR efficiency | Multiplexing mutant alleles challenging | Multiplexing mutant alleles challenging | immunogenicity unclear, challenging to definitively lineage trace mutant cells | Transgenes can potentially hop in and out before Flp/Cre dilution; potentially compatible/complementary with virtually all methods (Orthogonal to CRISPR/Cas variants; HITI; Slendr; Base writers) |
|-------------|-------------------------------------------------|------------------------------------------------------|-----------------------------------------------------------------------------------------------------|-----------------------------------------------------------------------------------------------------------------------------------------------------------------------------------------------------------------------------------------|---------------------------------------------------------------------|-----------------------------------------|-----------------------------------------|--------------------------------------------------------------------------------|----------------------------------------------------------------------------------------------------------------------------------------------------------------------------------------------------|

\*-BAC DNA can be utilized

\*\*-this decreases total cell yields

See text for further details
